# Supplementary material
Source: publisher site journal article supplement (https://www.spandidos-publications.com/5591/downloadSupplementary)

Figure S1. Colorectal cancer cells were positive for (A) MLH1 (IHC stain), (C) MSH2 (IHC stain), (E) MSH6 (IHC stain) and (G) PMS2 (IHC stain). Similarly, pancreatic cancer cells were also positive for (B) MLH1 (IHC stain), (D) MSH2 (IHC stain), (F) MSH6 (IHC stain) and (H) PMS2 (IHC stain) (all images: Left, x40 magnification; inset right, x200 magnification). IHC, immunohistochemical; MLH1, DNA mismatch repair protein Mlh1; MSH2, DNA mismatch repair protein Msh2; PMS2, mismatch repair endonuclease PMS2.

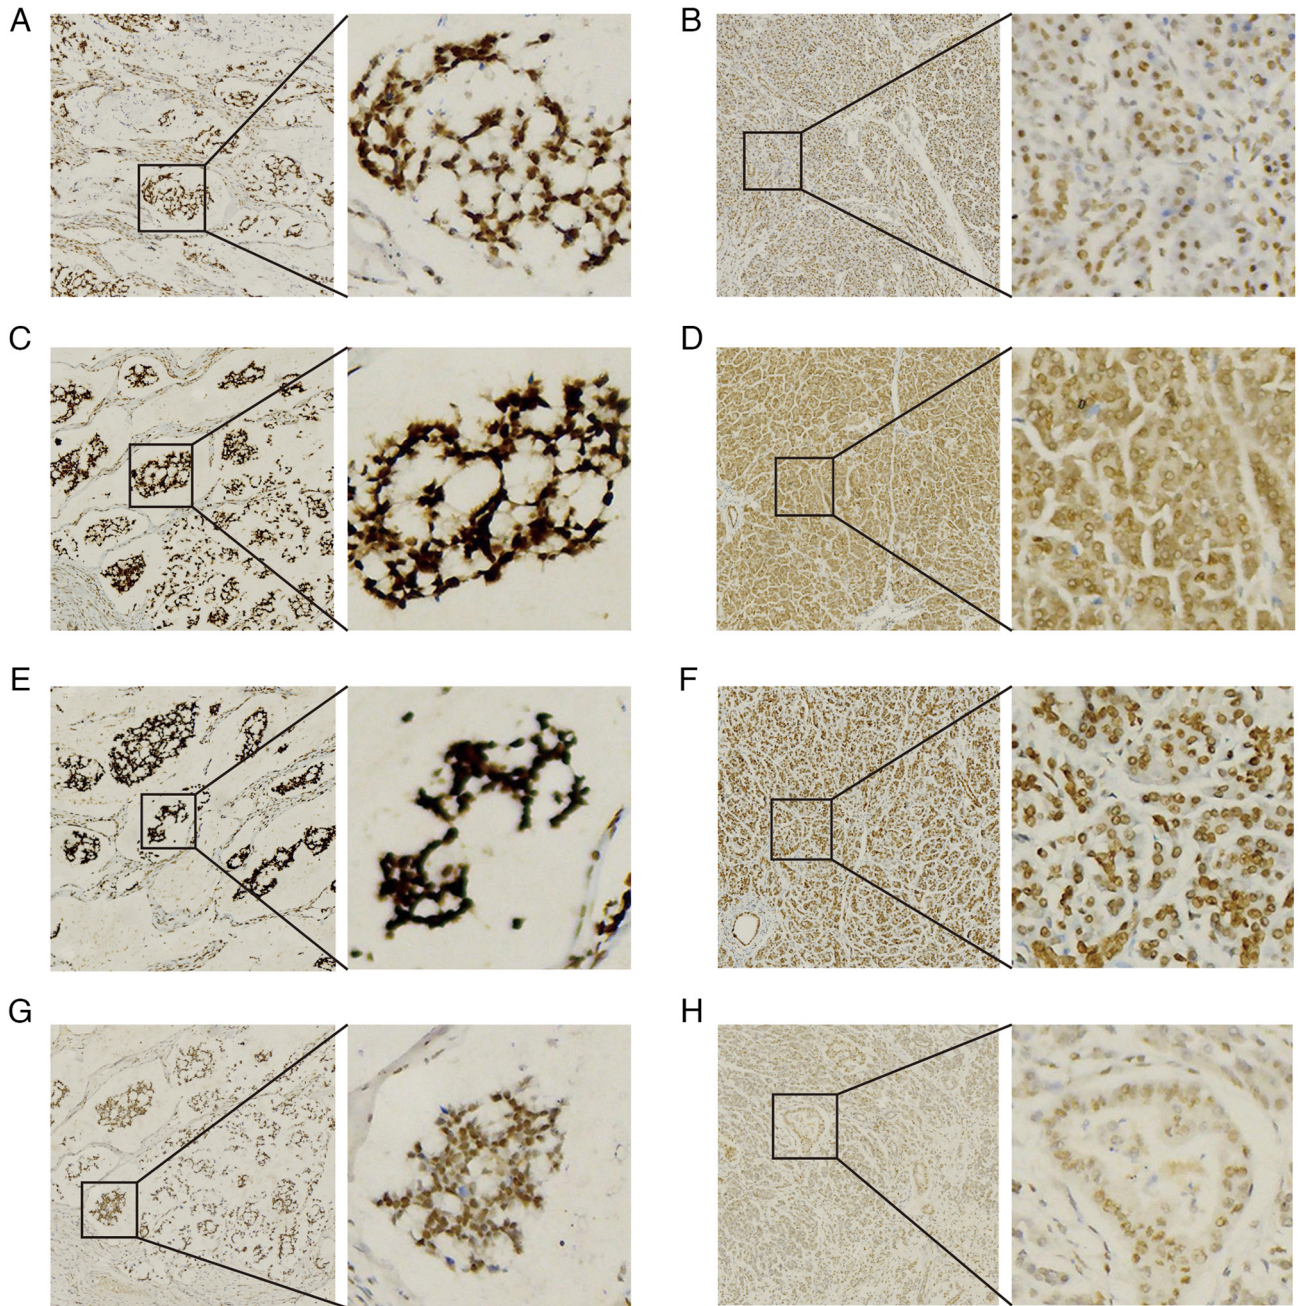

Supplement: Supplementary file 1 [file downloadSupplementary]
